# Supplementary material for: 25-Hydroxyvitamin D Inhibits Hepatitis C Virus Production in Hepatocellular Carcinoma Cell Line by a Vitamin D Receptor-Independent Mechanism
Source: Int J Mol Sci. 2019 May 13;20(9):2367. doi: 10.3390/ijms20092367 (PMC6539257; doi:10.3390/ijms20092367)
Supplement: Supplementary file 1 [file ijms-20-02367-s001.pdf]

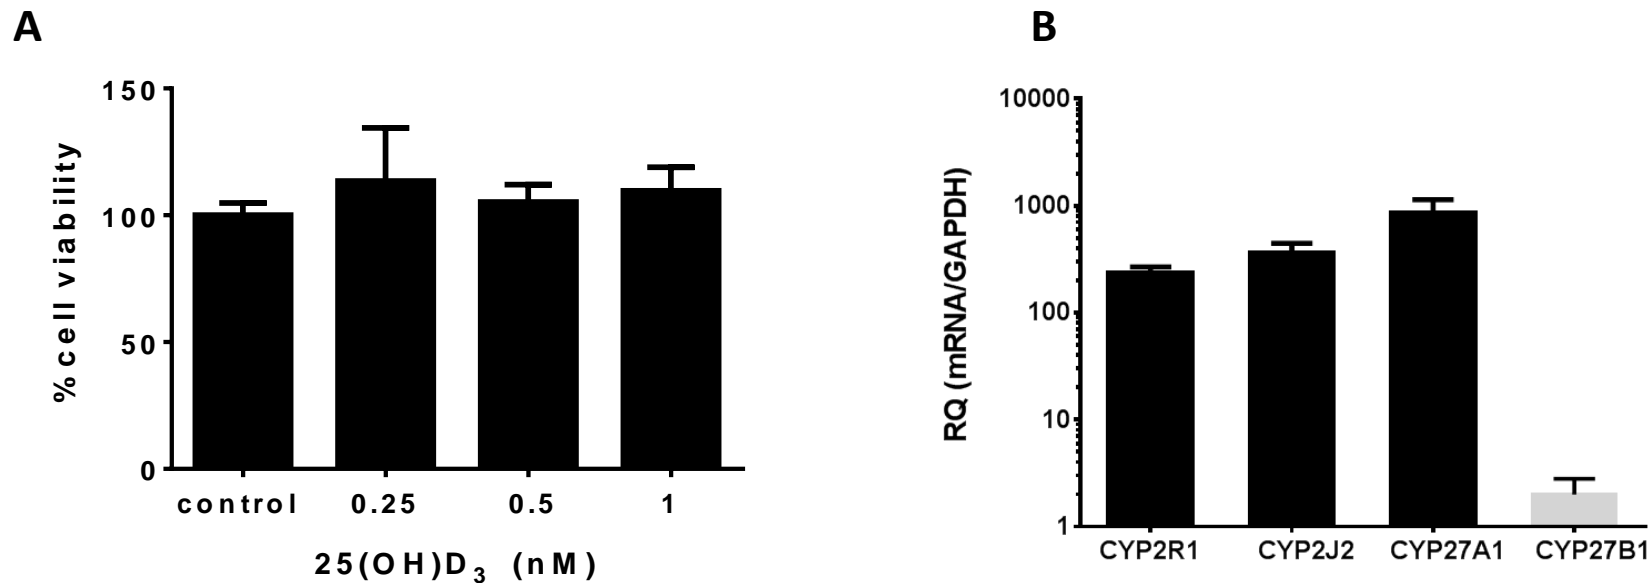

**Figure S1.** Effect of 25(OH)D<sub>3</sub> on Huh7.5 cell viability.

Huh7.5 cells treated with different concentration of 25(OH)D<sub>3</sub> (12.5-1000nM) for 24h. Cell viability was determined by AalamarBlue Cell Viability Reagent measuring fluorescence intensity in culture supernatants. Percent of inhibition and percent of viable cells was determined compared to non-treated cells set as 100%. (B) Real-time PCR analysis of vitamin D 25-hydroxylases (25(OH)ases RNA expression levels in Huh7.5 cells. Results are presented as relative quantity of the target gene normalized to GAPDH mRNA values. CYP27B1 was assigned a value of 1 and results are normalized to it. Results are shown as means relative quantity  $\pm$  SD.

A)

## Chromosome 12

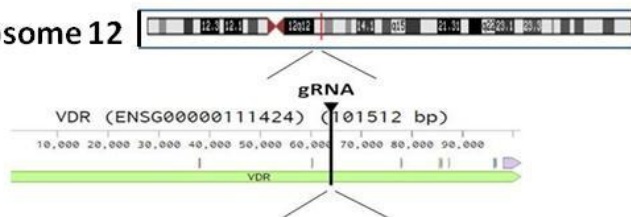

Target genomic locus

5'-CGGAACGTGCCCCGGATCTG TGG-3'

3'-CCCACAGATCCGGGGCACGT TCC-5'

c) a.

a.

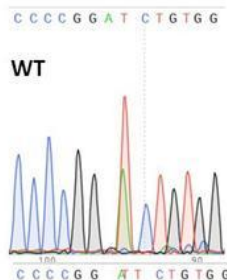

VDR clone#6-KO

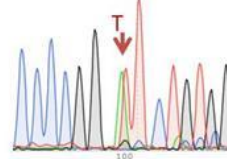

**C.**

WT

### VDR-KO-Clone #6

MEAMAASTSLPDPGDFDRNVPRICGVCGDRATGFHFNAMTCEGCKGFFRRSMKRKALFTC

MEAMAASTSLPDPGDFDRNVPRILWGVWRPSHWLSLQCYDL\*RLQRLLOAKHEAEGTIHL

**b.**

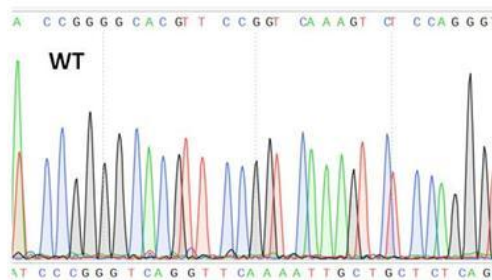

**VDR clone#2-KO**

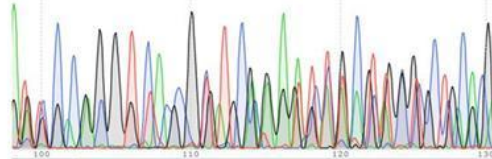

**B)**

D)

| bp | <i>Xho</i> II |     |     |     | uncut |
|----|---------------|-----|-----|-----|-------|
|    | WT            | C#2 | C#3 | C#6 |       |

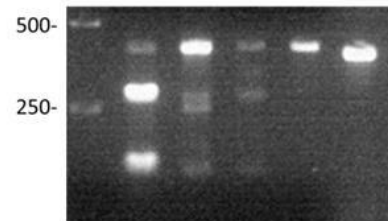

a.

gRNA -----CGGAACGTGCCCCGGATCTG-----

WT GAGACTTTGACCGGAAACGTGCCCCGGATCTGTGGGGTGTGTGGAGA  
GAGACTTTGACCGGAAACGTGCCCCGGA-CTGTGGGGTGTGTGGAGA  
GAGACTTTGACCGGAAACGTGCCCCGGG-CTGTGGGGTGTGTGGAGA  
GAGACTTTGACCGGAAACGTGCCCCGGA-TTGTGGGGTGTGTGGAGA  
GAGACTTTGACCGGAAACGTGCCCCGT-CTGTGGGGTGTGTGGAGA  
GAGACTTTGACCGGAAACGTGCCCCGT-CTGTGGGGTGTGTGGAGA  
GAGACTTTGACCGGAAACGTGCCCCGG-CTGTGGGGTGTGTGGAGA  
GAGACTTTGACCGGAAACGTGCCCCCT----GTGGGGTGTGTGGAGA  
GAGACTTTGACCGGAAACGTGCCCCGG-CTGTGGGGTGTGTGGAGA  
GAGACTTTGACCGGAAACGTGCCCCGG----ATGGGGTGTGTGGAGA  
GAGACTTTGACCGGAAACGTGCCCCGG----ATGGTGTGTGTGGAGA  
GAGACTTTGACCGGAAACGTGCCCCGG----ATGGGTGTGTGGAGA  
GAGACTTTGACCGGAAACGTGCTCTG----TGGGGTGTGTGGAGA  
GAGACTTTGACCGGAAACGTGCCCCGG----ATGGTGTGTGGAGA  
GAGACTTTGACCGGAAACGTGCCCTGT-----GGGTGTGTGGAGA  
GAGACTTTGACCGGAAACGTGCTGTG-----GGGTGTGTGGAGA  
GAGACTTTGACCGGAAACGTGCCCCG-----GGTGTGTGGAGA  
GAGACTTTGACCGGAAACGTGCC-----GGATGTGTGGAGA  
GAGACTTTGACCGGAAACGTGTC-----TGTGGGGTGTGTGGAGA  
GAGACTTTGACCGGAAACGTGT-----GGGTGTGTGGAGA  
GAGACTTTGACCGGAAACGTG-----GGGTGTGTGGAGA  
GAGACTTTGACCGGAAACGTGCCCCGGAT-----GTGTGGAGA  
GAGACTTTGACCGGAAACGTGCCCCGGA-TGTGGGGTGTGTGGAGA  
GAGACTTTGACCGGAAACGT-----CTGTGGGGTGTGTGGAGA  
GAGACTTTGACCGGAAAC-----TGTTGGGGTGTGTGGAGA  
GAGACTTTGACCGGAAAC-----GTGTGGAGA  
GAGACTTTA-----TCTGTGGGGTGTGTGGAGA  
GAGACTTTGACCG-----TCTGTGGGGTGTGTGGAGA

b.

**gRNA** CCGGAACGTGCCCCGGAT---CTG

WT

CCGGAACGTCGCCCCGGAT---CTGTGGGGTGTG  
CCGGAACGTCGCCCCGGATT---CTGTGGGGTGTG  
CCGGAACGTCGCCCCGGAAAT---CTGTGGGGTGTG  
CCGGAACGTCGCCCCGGATT---CTGTGGGGTGTG  
CCGGAACGTCGCCCCGGATC---CTGTGGGGTGTG  
CCGGAACGTCGCCCCGGATAT---CTGTGGGGTGTG  
CCGGAACGTCGCCCCGGATT---CTGTGGGGTGTG  
CCGGAACGTCGCCCCGGATGATCTGTGGGGTGTG

**Figure S2.** Outline of the generation of VDR-knockout (KO) Huh7.5.cells

(A) Schematic presentation of the target genomic locus of the human VDR gene. A boxed sequence indicates the site targeted by the guide RNA designed in this study. PAM; protospacer adjacent motif depicted in green (B) Gel electrophoresis of VDR target specific PCR of WT and selected clones (2,3 and 6) after digestion with MfII restriction enzyme. (C) DNA sequencing histogram of a. VDR #6 mutant and WT gene, the red arrows indicated the insertion positions; b. VDR #2 mutant and WT gene. c. Putative protein translation of the WT and the mutated seq. (VDR #6). (D) Sequence alignment of target regions of VDR gene sequences in mutated cell pool based on deep sequencing and analysis with the Cas-Analyzer analysis, gRNA position is indicated, multiple sequence alignment was performed using MULTALIN program ([https://npsa-prabi.ibcp.fr/cgi-bin/npsa\\_automat.pl?page=/NPSA/npsa\\_multalinan.html](https://npsa-prabi.ibcp.fr/cgi-bin/npsa_automat.pl?page=/NPSA/npsa_multalinan.html)) a) deletions b) insertions
